# Supplementary material
Source: publisher figshare collection journal article supplement (https://sage.figshare.com/ndownloader/files/18725072)
Supplement: Supplementary file 1 [file 18725072]

**Supplementary Material**

Table S1.

*Intraclass Correlation Coefficients (ICCs) of Outcome Measures at each Time Point.*

|                     | ICC      |      |           |
|---------------------|----------|------|-----------|
|                     | Baseline | Post | Follow-up |
| Attention           |          |      |           |
| Selective Attention | 0.00     | 0.00 | 0.16      |
| Sustained Attention | 0.16     | 0.25 | 0.17      |
| Hyperactivity       |          |      |           |
| Teacher Rated       | 0.15     | 0.05 | 0.13      |
| Parent Rated        | 0.02     | 0.00 | 0.00      |
| Inattention         |          |      |           |
| Teacher Rated       | 0.07     | 0.15 | 0.16      |
| Parent Rated        | 0.05     | 0.00 | 0.00      |
| Working Memory      |          |      |           |
| Verbal              | 0.14     | 0.04 | 0.00      |
| Visuospatial        | 0.15     | 0.29 | 0.06      |
| Numeracy            | 0.37     | 0.35 | 0.27      |

Table S2.

*CONSORT 2010 checklist – Extension for cluster randomised trial*

| Section/Topic                                        | Item No | Checklist item                                                                                                                                                                                                     | Page No             |
|------------------------------------------------------|---------|--------------------------------------------------------------------------------------------------------------------------------------------------------------------------------------------------------------------|---------------------|
| <b>Title and abstract</b>                            |         |                                                                                                                                                                                                                    |                     |
|                                                      | 1a      | Identification as a cluster randomised trial in the title                                                                                                                                                          | 1                   |
|                                                      | 1b      | Structured summary of trial design, methods, results, and conclusions (for specific guidance see CONSORT for abstracts)                                                                                            | 2                   |
| <b>Introduction</b>                                  |         |                                                                                                                                                                                                                    |                     |
| Background and objectives                            | 2a      | Rationale for using a cluster design                                                                                                                                                                               | 6                   |
|                                                      | 2b      | Whether objectives pertain to the cluster level, the individual participant level or both                                                                                                                          | 6                   |
| <b>Methods</b>                                       |         |                                                                                                                                                                                                                    |                     |
| Trial design                                         | 3a      | Definition of cluster and description of how the design features apply to the clusters                                                                                                                             | 7                   |
|                                                      | 3b      | Important changes to methods after trial commencement (such as eligibility criteria), with reasons                                                                                                                 | n/a                 |
| Participants                                         | 4a      | Eligibility criteria for clusters                                                                                                                                                                                  | 7                   |
|                                                      | 4b      | Settings and locations where the data were collected                                                                                                                                                               | 7                   |
| Interventions                                        | 5       | Whether interventions pertain to the cluster level, the individual participant level or both                                                                                                                       | 6                   |
| Outcomes                                             | 6a      | Whether outcome measures pertain to the cluster level, the individual participant level or both                                                                                                                    | 10-12               |
|                                                      | 6b      | Any changes to trial outcomes after the trial commenced, with reasons                                                                                                                                              | n/a                 |
| Sample size                                          | 7a      | Method of calculation, number of clusters(s) (and whether equal or unequal cluster sizes are assumed), cluster size, a coefficient of intracluster correlation (ICC or $k$ ), and an indication of its uncertainty | Figure 1. Table S1. |
|                                                      | 7b      | When applicable, explanation of any interim analyses and stopping guidelines                                                                                                                                       | n/a                 |
| <b>Randomisation</b>                                 |         |                                                                                                                                                                                                                    |                     |
| Sequence generation                                  | 8a      | Method used to generate the random allocation sequence                                                                                                                                                             | 6                   |
|                                                      | 8b      | Details of stratification or matching if used                                                                                                                                                                      | 6                   |
| Allocation concealment mechanism                     | 9       | Specification that allocation was based on clusters rather than individuals and whether allocation concealment (if any) was at the cluster level, the individual participant level or both                         | 6                   |
| Implementation                                       | 10a     | Who generated the random allocation sequence, who enrolled clusters, and who assigned clusters to interventions?                                                                                                   | 12                  |
|                                                      | 10b     | Mechanism by which individual participants were included in clusters for the purposes of the trial (such as complete enumeration, random sampling)                                                                 | 12                  |
|                                                      | 10c     | From whom consent was sought (representatives of the cluster, or individual cluster members, or both), and whether consent was sought before or after randomisation                                                | 13                  |
| Blinding                                             | 11a     | If done, who was blinded after assignment to interventions (for example, participants, care providers, those assessing outcomes) and how                                                                           | 7                   |
|                                                      | 11b     | If relevant, description of the similarity of interventions                                                                                                                                                        | 8-10                |
| Statistical methods                                  | 12a     | Statistical methods used to compare groups for primary and secondary outcomes. How clustering was taken into account                                                                                               | 13-14               |
|                                                      | 12b     | Methods for additional analyses, such as subgroup analyses and adjusted analyses                                                                                                                                   | n/a                 |
| <b>Results</b>                                       |         |                                                                                                                                                                                                                    |                     |
| Participant flow (a diagram is strongly recommended) | 13a     | For each group, the numbers of clusters that were randomly assigned, received intended treatment, and were analysed for the primary outcome                                                                        | Figure 1            |

## ATTENTION TRAINING FOR PRIMARY SCHOOL CHILDREN

|                          |     |                                                                                                                                               |                      |
|--------------------------|-----|-----------------------------------------------------------------------------------------------------------------------------------------------|----------------------|
|                          | 13b | For each group, losses and exclusions for both clusters and individual cluster members                                                        | Figure 1             |
| Recruitment              | 14a | Dates defining the periods of recruitment and follow-up                                                                                       | 7                    |
|                          | 14b | Why the trial ended or was stopped                                                                                                            | -                    |
| Baseline data            | 15  | Baseline characteristics for the individual and cluster levels as applicable for each group                                                   | Table 1              |
| Numbers analysed         | 16  | For each group, number of clusters included in each analysis                                                                                  | Figure 1             |
| Outcomes and estimation  | 17a | Results at the individual or cluster level as applicable and a coefficient of intracluster correlation (ICC or $k$ ) for each primary outcome | Tables 2, 3, 4 & S1. |
|                          | 17b | For binary outcomes, presentation of both absolute and relative effect sizes is recommended                                                   | 17-18                |
| Ancillary analyses       | 18  | Results of any other analyses performed, including subgroup analyses and adjusted analyses, distinguishing pre-specified from exploratory     | 19                   |
| Harms                    | 19  | All-important harms or unintended effects in each group (for specific guidance see CONSORT for harms)                                         | n/a                  |
| <b>Discussion</b>        |     |                                                                                                                                               |                      |
| Limitations              | 20  | Trial limitations, addressing sources of potential bias, imprecision, and, if relevant, multiplicity of analyses                              | 22-23                |
| Generalisability         | 21  | Generalisability to clusters and/or individual participants (as relevant)                                                                     | 24                   |
| Interpretation           | 22  | Interpretation consistent with results, balancing benefits and harms, and considering other relevant evidence                                 | 24-25                |
| <b>Other information</b> |     |                                                                                                                                               |                      |
| Registration             | 23  | Registration number and name of trial registry                                                                                                | 7                    |
| Protocol                 | 24  | Where the full trial protocol can be accessed, if available                                                                                   | n/a                  |
| Funding                  | 25  | Sources of funding and other support (such as supply of drugs), role of funders                                                               | 1                    |
